# Supplementary material for: Position-specific prediction of methylation sites from sequence conservation based on information theory
Source: PubMed Central journal article supplement (PMC5378888; doi:10.1038/srep12403), 2015-07-23
Supplement: srep12403-s1.pdf [file srep12403-s1.pdf]

# Position-specific prediction of methylation sites from sequence conservation based on information theory

Yinan Shi, Yanzhi Guo\*, Yayun Hu, Menglong Li\*

College of Chemistry, Sichuan University, Chengdu, Sichuan 610064, PR China

Corresponding authors marked with \*

Yanzhi Guo

Menglong Li

Tel: +86 28 85413330

Fax: +86 28 85412356

E-mail address: [yzguo@scu.edu.cn](mailto:yzguo@scu.edu.cn)

[liml@scu.edu.cn](mailto:liml@scu.edu.cn)

## Supplementary Figures:

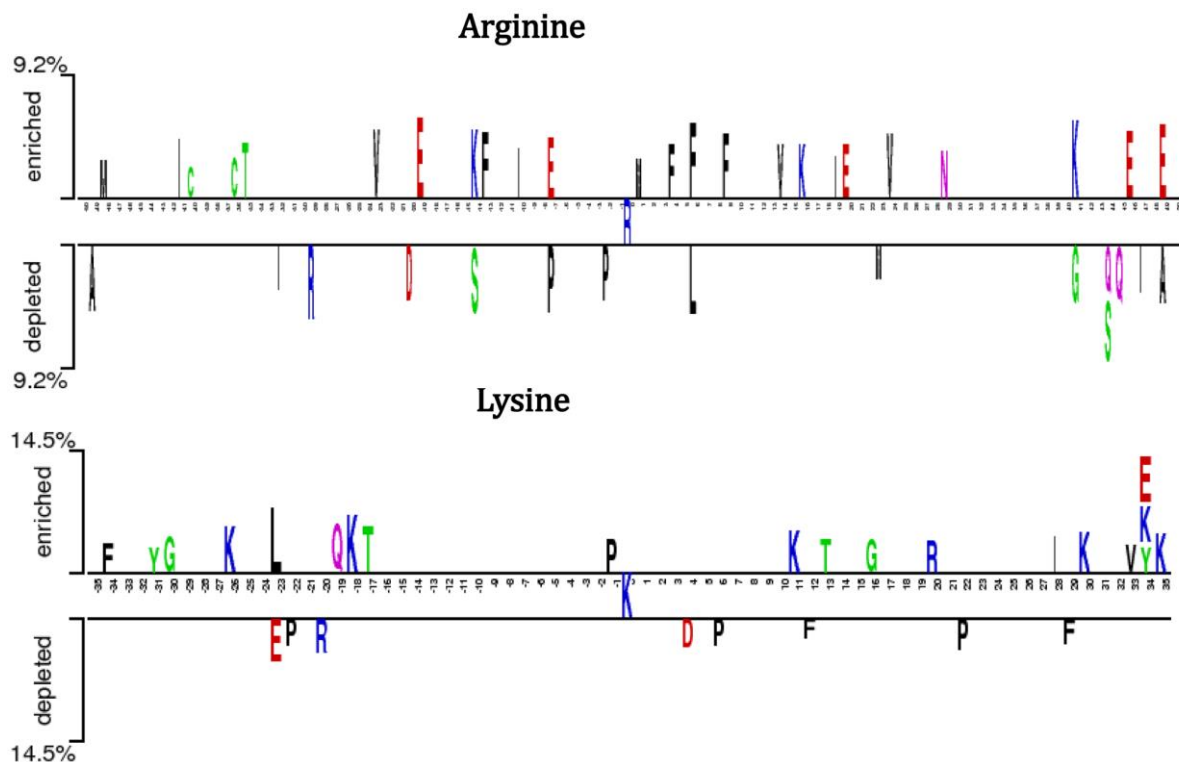

Supplementary Figure S1 | Two Sample Logo between the negative subset and the whole non-methylated samples for arginine and lysine methylation, respectively.

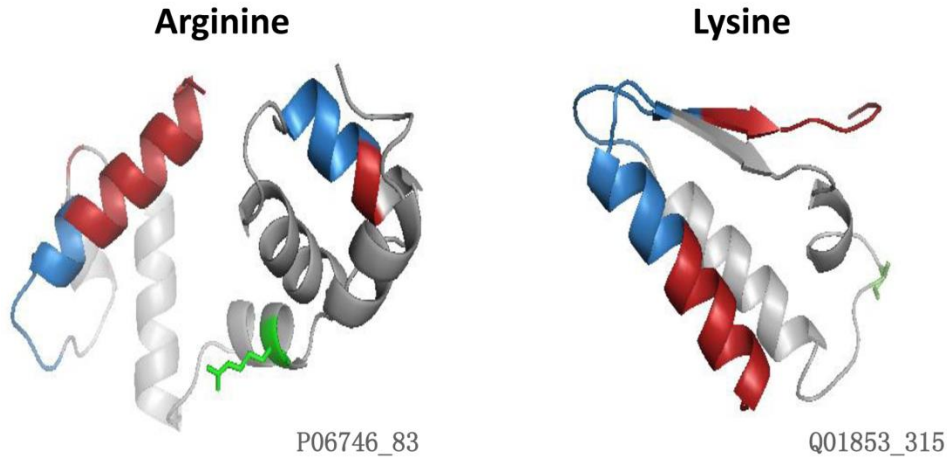

Supplementary Figure S2 | 3D-structural of methylation peptide for arginine and lysine, respectively. The amino acid in green color is the methylation site. The red ones represent that these residues far away from methylation in sequence are closer to the methylation site in structure as compared to the blue ones.

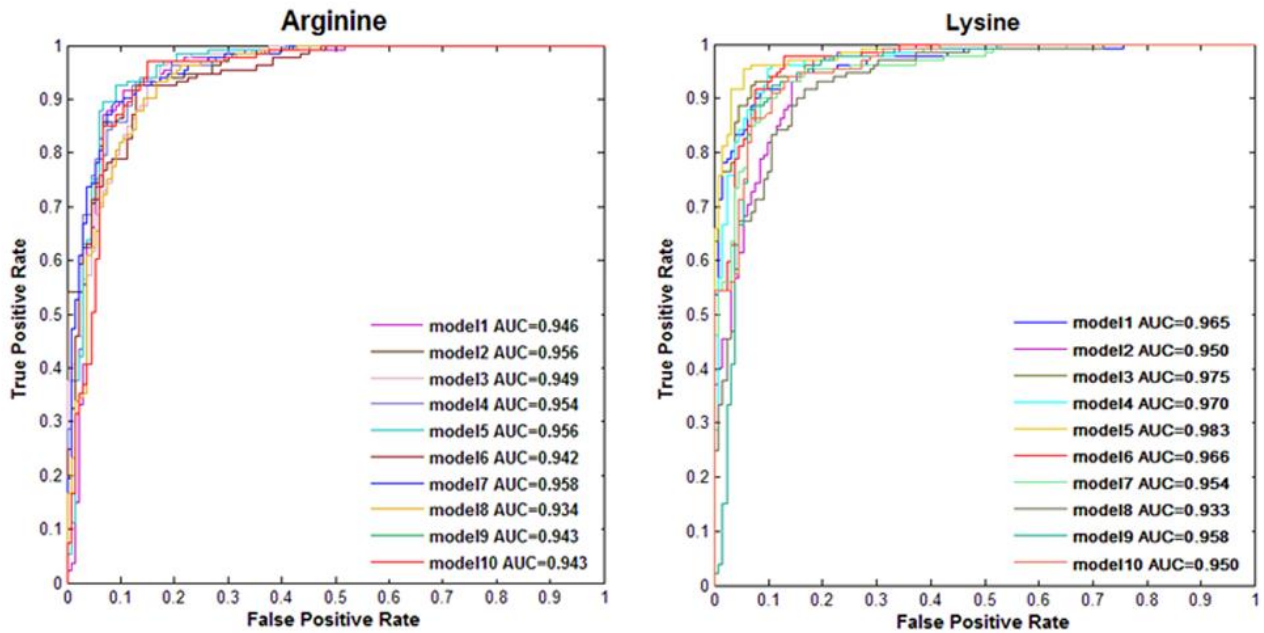

Supplementary Figure S3 | ROC curves of 5-fold cross-validation on 10 training sets for arginine and lysine methylation, respectively.

## Supplementary Tables:

Supplementary Table S1 | A summary of IG score of positions for arginine and lysine methylation peptide.

| <b>Positions</b> | <b>Arginine</b> | <b>Lysine</b> |
|------------------|-----------------|---------------|
| -50              | 0.0572          |               |
| -49              | 0.0586          |               |
| -48              | 0.0530          |               |
| -47              | 0.0743          |               |
| -46              | 0.0546          |               |
| -45              | 0.0586          |               |
| -44              | 0.0511          |               |
| -43              | 0.0592          |               |
| -42              | 0.0501          |               |
| -41              | 0.0513          |               |
| -40              | 0.0455          |               |
| -39              | 0.0481          |               |
| -38              | 0.0652          |               |
| -37              | 0.0496          |               |
| -36              | 0.0427          |               |
| -35              | 0.0559          | 0.0599        |
| -34              | 0.0536          | 0.0598        |
| -33              | 0.0504          | 0.0564        |
| -32              | 0.0434          | 0.0540        |
| -31              | 0.0554          | 0.0624        |
| -30              | 0.0485          | 0.0531        |
| -29              | 0.0434          | 0.0559        |
| -28              | 0.0454          | 0.0507        |
| -27              | 0.0460          | 0.0504        |
| -26              | 0.0338          | 0.0573        |
| -25              | 0.0478          | 0.0562        |
| -24              | 0.0444          | 0.0602        |
| -23              | 0.0479          | 0.0574        |
| -22              | 0.0517          | 0.0536        |
| -21              | 0.0372          | 0.0579        |
| -20              | 0.0340          | 0.0573        |
| -19              | 0.0391          | 0.0566        |
| -18              | 0.0479          | 0.0450        |
| -17              | 0.0481          | 0.0479        |
| -16              | 0.0371          | 0.0464        |
| -15              | 0.0446          | 0.0531        |

|     |        |        |
|-----|--------|--------|
| -14 | 0.0314 | 0.0468 |
| -13 | 0.0345 | 0.0510 |
| -12 | 0.0273 | 0.0491 |
| -11 | 0.0336 | 0.0458 |
| -10 | 0.0424 | 0.0427 |
| -9  | 0.0334 | 0.0321 |
| -8  | 0.0258 | 0.0365 |
| -7  | 0.0371 | 0.0390 |
| -6  | 0.0210 | 0.0339 |
| -5  | 0.0387 | 0.0344 |
| -4  | 0.0395 | 0.0234 |
| -3  | 0.0429 | 0.0125 |
| -2  | 0.0390 | 0.0171 |
| -1  | 0.0339 | 0.0337 |
| 0   | 0.0000 | 0.0000 |
| 1   | 0.1069 | 0.0162 |
| 2   | 0.0480 | 0.0214 |
| 3   | 0.0262 | 0.0166 |
| 4   | 0.0208 | 0.0263 |
| 5   | 0.0394 | 0.0152 |
| 6   | 0.0149 | 0.0310 |
| 7   | 0.0189 | 0.0272 |
| 8   | 0.0471 | 0.0256 |
| 9   | 0.0365 | 0.0204 |
| 10  | 0.0323 | 0.0213 |
| 11  | 0.0501 | 0.0324 |
| 12  | 0.0324 | 0.0264 |
| 13  | 0.0461 | 0.0277 |
| 14  | 0.0321 | 0.0339 |
| 15  | 0.0312 | 0.0231 |
| 16  | 0.0458 | 0.0264 |
| 17  | 0.0415 | 0.0217 |
| 18  | 0.0455 | 0.0348 |
| 19  | 0.0331 | 0.0430 |
| 20  | 0.0459 | 0.0226 |
| 21  | 0.0410 | 0.0291 |
| 22  | 0.0432 | 0.0206 |
| 23  | 0.0370 | 0.0312 |
| 24  | 0.0328 | 0.0401 |
| 25  | 0.0448 | 0.0305 |
| 26  | 0.0392 | 0.0304 |
| 27  | 0.0493 | 0.0353 |
| 28  | 0.0356 | 0.0340 |
| 29  | 0.0347 | 0.0424 |

|    |        |        |
|----|--------|--------|
| 30 | 0.0400 | 0.0398 |
| 31 | 0.0318 | 0.0284 |
| 32 | 0.0407 | 0.0432 |
| 33 | 0.0328 | 0.0525 |
| 34 | 0.0507 | 0.0489 |
| 35 | 0.0366 | 0.0429 |
| 36 | 0.0441 |        |
| 37 | 0.0490 |        |
| 38 | 0.0467 |        |
| 39 | 0.0334 |        |
| 40 | 0.0338 |        |
| 41 | 0.0394 |        |
| 42 | 0.0350 |        |
| 43 | 0.0356 |        |
| 44 | 0.0416 |        |
| 45 | 0.0461 |        |
| 46 | 0.0297 |        |
| 47 | 0.0470 |        |
| 48 | 0.0366 |        |
| 49 | 0.0482 |        |
| 50 | 0.0487 |        |

---

Supplementary Table S2 | The performance of 10 models in 5-fold cross-validation on 40% identity training set for arginine and lysine methylation.

| Training Set | Model   | Se (%) | Sp (%) | Acc (%) | MCC  |
|--------------|---------|--------|--------|---------|------|
| Arginine     | 1       | 78.31  | 84.41  | 81.36   | 0.64 |
|              | 2       | 80.59  | 80.96  | 80.77   | 0.62 |
|              | 3       | 81.99  | 88.01  | 85.00   | 0.71 |
|              | 4       | 77.13  | 86.69  | 81.91   | 0.65 |
|              | 5       | 79.41  | 90.44  | 84.93   | 0.71 |
|              | 6       | 83.04  | 88.58  | 85.81   | 0.72 |
|              | 7       | 83.64  | 86.85  | 85.25   | 0.71 |
|              | 8       | 84.43  | 86.64  | 85.54   | 0.71 |
|              | 9       | 83.70  | 87.36  | 85.53   | 0.71 |
|              | 10      | 83.70  | 87.36  | 85.53   | 0.71 |
|              | Average | 81.59  | 86.73  | 84.16   | 0.69 |
| Lysine       | 1       | 83.50  | 83.75  | 83.63   | 0.68 |
|              | 2       | 84.83  | 73.50  | 79.17   | 0.59 |
|              | 3       | 84.83  | 82.33  | 83.58   | 0.68 |
|              | 4       | 84.83  | 89.58  | 87.21   | 0.76 |
|              | 5       | 81.00  | 87.33  | 84.17   | 0.69 |
|              | 6       | 84.67  | 89.25  | 86.96   | 0.74 |
|              | 7       | 85.81  | 87.75  | 86.78   | 0.74 |
|              | 8       | 85.52  | 88.11  | 86.81   | 0.74 |
|              | 9       | 85.33  | 88.37  | 86.85   | 0.74 |
|              | 10      | 85.33  | 88.37  | 86.85   | 0.74 |
|              | Average | 84.57  | 85.84  | 85.20   | 0.71 |

Supplementary Table S3 | The performance of 10 models on testing set under 40% identity for arginine and lysine methylation.

| Testing Set | Model   | Se (%) | Sp (%) | Acc (%) | MCC  |
|-------------|---------|--------|--------|---------|------|
| Arginine    | 1       | 81.25  | 87.50  | 86.54   | 0.59 |
|             | 2       | 81.25  | 88.64  | 87.50   | 0.61 |
|             | 3       | 81.25  | 87.50  | 86.54   | 0.59 |
|             | 4       | 87.50  | 90.91  | 90.38   | 0.69 |
|             | 5       | 87.50  | 87.50  | 87.50   | 0.63 |
|             | 6       | 87.50  | 88.64  | 88.46   | 0.65 |
|             | 7       | 81.25  | 87.50  | 86.54   | 0.59 |
|             | 8       | 93.75  | 90.91  | 91.35   | 0.74 |
|             | 9       | 81.25  | 89.77  | 88.46   | 0.63 |
|             | 10      | 81.25  | 87.50  | 86.54   | 0.59 |
|             | Average | 84.38  | 88.64  | 87.98   | 0.63 |
| Lysine      | 1       | 86.67  | 91.78  | 90.91   | 0.72 |
|             | 2       | 86.67  | 94.52  | 93.18   | 0.77 |
|             | 3       | 86.67  | 86.30  | 86.36   | 0.62 |
|             | 4       | 80.00  | 90.41  | 88.64   | 0.64 |
|             | 5       | 86.67  | 89.04  | 88.64   | 0.67 |
|             | 6       | 86.67  | 91.78  | 90.91   | 0.72 |
|             | 7       | 86.67  | 90.41  | 89.77   | 0.69 |
|             | 8       | 80.00  | 89.04  | 87.50   | 0.62 |
|             | 9       | 86.67  | 94.52  | 93.18   | 0.77 |
|             | 10      | 80.00  | 89.04  | 87.50   | 0.62 |
|             | Average | 84.67  | 90.68  | 89.66   | 0.68 |

Supplementary Table S4 | The performance of our method on the subset of the common independent test set sharing <30% sequence identity with the training dataset.

| Residue  | Se (%)       | Sp (%)         | Acc (%) | MCC  |
|----------|--------------|----------------|---------|------|
| Arginine | 75.00 (6/8)  | 93.94 (93/99)  | 92.52   | 0.57 |
| Lysine   | 76.47(26/34) | 84.29(177/210) | 83.20   | 0.49 |

Supplementary Table S5 | Position-specific distribution difference profiles for arginine and lysine methylation, respectively.

| Arginine methylation |        |        |        |        |        |        |        |        |        |        |        |        |        |        |        |
|----------------------|--------|--------|--------|--------|--------|--------|--------|--------|--------|--------|--------|--------|--------|--------|--------|
|                      | -50    | -49    | -48    | -47    | -46    | -45    | -44    | -43    | -42    | -41    | -40    | -39    | -38    | -37    | -36    |
| A                    | -0.019 | -0.054 | -0.028 | -0.081 | 0.005  | 0.155  | 0.1079 | -0.064 | -0.01  | 0.0084 | 0.0501 | -0.073 | 0.131  | 0.0504 | -0.028 |
| C                    | -0.028 | 0.1063 | -0.064 | -0.076 | 0.0618 | -0.033 | -0.055 | 0.0196 | -0.034 | -0.051 | -0.003 | -0.013 | -0.088 | 0.0309 | -0.109 |
| D                    | -0.006 | 0.0986 | -0.018 | 0.0846 | 0.0139 | -0.057 | 0.0057 | -0.049 | -9E-04 | -0.066 | 0.0224 | 0.0571 | 0.0249 | -0.062 | 0.0355 |
| E                    | -0.028 | -0.009 | 0.027  | 0.049  | -0.028 | -0.073 | -0.075 | 0.045  | -0.001 | 0.0054 | 0.0364 | -0.03  | -0.133 | -0.135 | -0.044 |
| F                    | 0.0303 | -0.074 | 0.0604 | -0.176 | 0.1092 | -0.003 | -0.043 | -0.027 | -0.062 | -0.105 | -0.047 | 0.079  | -0.024 | 0.0835 | 0.027  |
| G                    | 0.1066 | 0.0747 | 0.0563 | 0.0175 | -0.05  | -0.005 | 0.0284 | 0.0615 | 0.0917 | 0.1011 | 0.0042 | -0.038 | 0.057  | 0.0012 | 0.0586 |
| H                    | -0.064 | -0.04  | 0.0323 | 0.0799 | 0.0599 | 0.0316 | 0.0181 | 0.0826 | -0.142 | 0.1021 | -0.01  | 0.0211 | 0.0127 | -0.058 | -0.023 |
| I                    | -0.075 | -0.074 | 0.0474 | -0.091 | 0.0098 | -0.137 | -0.104 | -0.076 | 0.0424 | -0.072 | -0.027 | -0.031 | -0.014 | -0.045 | -0.067 |
| K                    | -0.028 | 0.0364 | -0.074 | -0.142 | -0.049 | 0.0341 | -0.055 | 0.007  | 0.0477 | -0.121 | -0.087 | -0.078 | -0.147 | -0.087 | 0.0421 |
| L                    | -0.014 | -0.071 | -0.054 | 0.0102 | -0.028 | -0.102 | -0.008 | -0.227 | -0.035 | -0.073 | -0.139 | -0.09  | -0.174 | -0.036 | -0.029 |
| M                    | -0.034 | -0.116 | -0.011 | -0.012 | 0.0408 | 0.0094 | 0.0327 | -0.05  | -0.017 | 0.0486 | 0.0274 | -0.032 | 0.008  | 0.0041 | 0.0405 |
| N                    | -0.062 | 0.1062 | -0.009 | -0.142 | 0.1303 | -0.053 | -0.051 | 0.0328 | -0.09  | 0.0374 | -0.039 | 0.0807 | 0.061  | 0.0046 | -0.066 |
| P                    | 0.0112 | -0.012 | 0.0505 | 0.1528 | 0.0432 | 0.0645 | 0.0292 | 0.0712 | 0.0515 | 0.0501 | -0.062 | 0.1056 | 0.1734 | -0.013 | -0.007 |
| Q                    | -0.125 | -0.118 | -0.153 | -0.001 | -0.047 | 0.0411 | 0.0502 | 0.0309 | -0.002 | 0.0006 | 0.0785 | 0.0425 | 0.0084 | -0.055 | -0.011 |
| R                    | 0.0967 | -0.003 | -0.028 | -0.056 | -0.054 | 0.0765 | -0.043 | 0.0832 | -0.006 | -0.045 | 0.0471 | 0.0007 | -0.075 | 0.0117 | 0.0103 |
| S                    | 0.069  | 0.0236 | 0.0173 | 0.071  | 0.0195 | 0.0446 | 0.1136 | 0.0838 | -0.087 | 0.0329 | 0.0255 | -0.008 | -0.057 | 0.119  | 0.0305 |
| T                    | 0.0744 | 0.0245 | -0.047 | -0.037 | -0.066 | -0.015 | -0.051 | -0.096 | 0.062  | 0.0181 | 0.0152 | 0.0151 | 0.0049 | -0.05  | -0.003 |
| V                    | -0.134 | -0.009 | 0.0399 | -0.044 | -0.134 | -0.076 | -0.067 | -0.071 | -0.013 | -0.021 | 0.0214 | -0.059 | -0.002 | 0.0288 | -0.039 |
| W                    | -0.044 | 0.0024 | 0.0738 | 0.0739 | 0.0446 | -0.07  | -0.044 | -0.07  | 0.0314 | 0.0724 | -0.064 | -0.058 | -0.044 | 0.0152 | -0.044 |
| Y                    | 0.0364 | -0.062 | 0.0265 | 0.1107 | -0.046 | -0.057 | 0.0172 | 0.0086 | 0.0262 | -0.037 | 0.036  | 0.0447 | 0.085  | 0.0576 | 0.0599 |
| X                    | 0      | 0      | 0      | 0      | 0      | 0      | 0      | 0      | 0      | 0      | 0      | 0      | 0      | 0      | 0      |
|                      | -35    | -34    | -33    | -32    | -31    | -30    | -29    | -28    | -27    | -26    | -25    | -24    | -23    | -22    | -21    |
| A                    | 0.1078 | -0.053 | 0.076  | 0.0092 | 0.0807 | 0.0495 | 0.0143 | -0.014 | 0.0893 | -0.035 | -0.126 | -0.025 | 0.1111 | 0.1006 | 0.0204 |
| C                    | -0.104 | 0.0474 | 0.0539 | -0.06  | -0.033 | 0.0483 | 0.0293 | -0.098 | -0.024 | 5E-05  | 0.0061 | 0.005  | 0.0202 | -0.024 | 0.0224 |
| D                    | -0.066 | 0.1112 | 0.0742 | -9E-04 | -0.038 | 0.043  | -0.018 | -0.003 | -0.058 | -0.086 | 0.008  | 0.0413 | -0.101 | -0.089 | 0.0005 |
| E                    | -0.094 | -0.017 | -0.105 | 0.0163 | -0.082 | -0.09  | -0.033 | -0.1   | -0.081 | -0.003 | 0.0602 | -0.003 | -0.034 | -0.069 | 0.0262 |
| F                    | 0.0481 | -0.029 | -0.012 | 0.0066 | -0.15  | -0.033 | -0.045 | -0.045 | -0.056 | 0.0154 | -0.053 | 0.0627 | 0.0729 | -0.05  | -0.057 |
| G                    | 0.0749 | 0.0986 | 0.0989 | 0.0212 | 0.0594 | 0.0615 | 0.0604 | 0.1023 | 0.0551 | -0.009 | 0.0205 | -0.074 | 0.1262 | 0.0962 | 0.0319 |
| H                    | -0.093 | -0.068 | -0.046 | -0.014 | -0.07  | 0.0626 | 0.0838 | 0.0308 | -0.009 | 0.0047 | -0.083 | -0.065 | -0.051 | -0.092 | -0.034 |
| I                    | 0.0151 | -0.091 | 0.0078 | -0.039 | -0.087 | -0.075 | -0.087 | -0.067 | -0.022 | -0.052 | -0.037 | -0.065 | -0.041 | -0.092 | -0.095 |
| K                    | 0.0217 | -0.169 | -8E-04 | -0.048 | 0.0654 | 0.0216 | 0.0118 | -0.081 | -0.033 | -0.093 | 0.0112 | -0.022 | 0.02   | 0.0933 | -0.047 |
| L                    | -0.116 | -0.016 | -0.004 | 0.0186 | -0.122 | -0.101 | -0.153 | 0.0304 | -0.03  | -0.055 | -0.156 | -0.086 | -0.083 | -0.011 | 0.0281 |
| M                    | -0.028 | 0.0162 | -0.046 | 0.1046 | 0.0607 | -0.012 | -0.012 | -0.02  | -0.014 | 0.0923 | 0.0545 | 0.0361 | -0.021 | 0.0722 | 0.0194 |
| N                    | 0.0405 | -0.167 | 0.0249 | 0.0357 | 0.0281 | -0.064 | -0.099 | 0.0221 | -0.112 | 0.0407 | 0.0495 | -0.019 | 0.0288 | -0.045 | -0.019 |
| P                    | 0.1226 | 0.06   | -0.056 | 0.0903 | 0.0624 | 0.1106 | 0.0984 | 0.0531 | 0.0057 | 0.0085 | 0.113  | 0.1134 | 0.0433 | 0.0835 | 0.0353 |
| Q                    | -0.042 | 0.0296 | -0.093 | -0.004 | 0.1234 | -0.053 | -0.02  | 0.0469 | -0.067 | 0.0633 | 0.0397 | 0.0413 | -0.021 | -0.161 | -0.063 |



|   |        |        |        |        |        |        |        |        |        |        |        |        |        |        |        |
|---|--------|--------|--------|--------|--------|--------|--------|--------|--------|--------|--------|--------|--------|--------|--------|
| R | -0.044 | -0.03  | -0.011 | -0.067 | 0.0063 | 0.0464 | 0.0342 | 0.0959 | 0.0084 | 0.0688 | -0.054 | 0.1095 | -0.016 | 0.0339 | 0.0898 |
| S | 0.0726 | 0.0425 | -0.076 | -0.032 | -0.008 | 0.0354 | 0.0462 | -0.023 | 0.0621 | 0.038  | -0.05  | -0.069 | -0.042 | -0.044 | -0.013 |
| T | -0.113 | -0.012 | -0.006 | 0.0229 | -0.109 | -0.174 | 0.0055 | 0.0061 | 0.0057 | -0.023 | -0.009 | -0.127 | -0.129 | -0.072 | -0.099 |
| V | -0.044 | 0.0705 | -0.112 | -0.104 | -0.097 | -0.004 | -0.064 | -0.07  | -0.047 | 0.0121 | 0.0326 | -0.024 | 0.0229 | -0.05  | -0.022 |
| W | 0.0221 | -0.064 | 0.0638 | -0.082 | 0.0145 | -0.082 | -0.024 | -0.064 | 0.0554 | -0.03  | -0.057 | 0.0887 | -0.044 | -0.069 | -0.044 |
| Y | -0.011 | 0.056  | 0.0884 | 0.0653 | 0.0639 | 0.025  | 0.0233 | 0.0257 | 0.1588 | 0.0043 | 0.1184 | 0.061  | -0.101 | 0.083  | 0.1046 |
| X | 0      | 0      | 0      | 0      | 0      | 0      | 0      | 0      | 0      | 0      | 0      | 0      | 0      | 0      | 0      |
|   | -20    | -19    | -18    | -17    | -16    | -15    | -14    | -13    | -12    | -11    | -10    | -9     | -8     | -7     | -6     |
| A | -0.06  | -0.035 | 0.1861 | -0.007 | 0.1043 | -0.063 | -0.059 | 0.0479 | -0.186 | -0.051 | 0.0184 | -0.05  | 0.0362 | 0.0451 | -0.104 |
| C | 0.0167 | -0.035 | -0.006 | -0.031 | -0.057 | 0.0927 | -0.053 | -0.013 | -0.117 | -0.092 | -0.077 | 0.0131 | -0.026 | -0.102 | -0.028 |
| D | 0.0147 | -0.072 | -0.128 | -0.075 | -0.008 | -0.018 | 0.0987 | 0.0436 | -0.003 | 0.0024 | 0.0053 | 0.0301 | -0.023 | -0.057 | -0.087 |
| E | -0.05  | 0.0024 | -0.119 | -0.157 | -0.036 | -0.104 | -0.061 | -0.037 | 0.0265 | -0.081 | -0.072 | -0.115 | 0.0532 | -0.098 | -0.025 |
| F | -0.019 | 0.0351 | 0.0195 | -0.086 | -0.079 | -0.016 | 0.0227 | -0.059 | -0.039 | -0.043 | 0.0038 | -0.028 | -0.002 | -0.039 | -0.014 |
| G | 0.0662 | 0.0728 | 0.1093 | 0.1237 | -0.011 | 0.18   | 0.1285 | 0.1093 | 0.035  | 0.1348 | 0.0691 | 0.0962 | 0.1135 | 0.0179 | 0.073  |
| H | -0.088 | 0.0165 | 0.099  | 0.0182 | -0.025 | -0.108 | -0.117 | -0.136 | -0.048 | -0.059 | 0.0249 | -0.081 | -0.013 | 0.0347 | -0.014 |
| I | -0.027 | -0.047 | -0.121 | -0.112 | -0.015 | -0.197 | 0.0045 | 0.0568 | -0.02  | -0.057 | -0.087 | -0.07  | -0.046 | -2E-04 | 0.0167 |
| K | -0.035 | -0.082 | -0.087 | 0.0453 | 0.0657 | -0.052 | -0.08  | -0.144 | -0.017 | 0.0843 | -0.098 | -0.124 | -0.064 | -0.032 | -0.086 |
| L | -0.011 | -0.055 | -0.071 | -0.005 | -0.208 | -0.027 | -0.088 | 0.015  | 0.0029 | -0.04  | -0.098 | -0.067 | -0.171 | -0.118 | -0.051 |
| M | -0.052 | 0.0811 | -9E-04 | 0.0741 | -0.008 | -0.013 | -0.059 | -0.055 | -0.026 | -0.153 | 0.039  | 0.054  | 0.0418 | -0.068 | 0.0155 |
| N | 0.0677 | 0.0437 | -0.008 | -0.064 | -0.038 | 0.0617 | -0.036 | 0.0854 | -0.076 | 0.0257 | 0.0038 | 0.0185 | -0.022 | -0.074 | -0.041 |
| P | 0.0071 | -0.034 | 0.0421 | -0.01  | 0.0925 | -0.046 | 0.0756 | 0.0404 | 0.0355 | 0.0512 | 0.1554 | 0.0216 | -0.01  | 0.0823 | 0.0351 |
| Q | -0.031 | -0.006 | 0.0388 | -0.138 | -0.065 | 0.0142 | -0.05  | -0.046 | 0.0014 | 0.0145 | -0.01  | -0.001 | 0.0187 | 0.0292 | -0.054 |
| R | -0.016 | 0.1334 | 0.0358 | 0.1929 | 0.1293 | 0.0454 | -0.005 | -0.029 | 0.1353 | 0.0842 | 0.0697 | 0.139  | 0.0666 | 0.2082 | 0.0256 |
| S | 0.0112 | 0.0045 | -0.002 | -0.029 | -0.011 | -0.014 | 0.0156 | 0.0255 | 0.0269 | -0.009 | -0.065 | 0.0875 | 0.0068 | -0.007 | 0.0441 |
| T | -0.021 | -0.039 | -0.077 | 0.0732 | -7E-04 | -0.029 | 0.0305 | -0.142 | 0.0432 | -0.064 | 0.0261 | -0.027 | 0.0095 | 0.0327 | 0.0517 |
| V | 0.0415 | -0.095 | -0.06  | -0.014 | 0.0076 | -0.053 | -0.043 | -0.021 | 0.0122 | 0.0232 | -0.255 | -0.077 | -0.02  | 0.062  | 0.0857 |
| W | 0.0136 | -0.044 | -5E-04 | -0.075 | -0.063 | 0.0316 | -0.032 | -0.043 | -0.008 | -0.069 | -0.002 | 0.0733 | -0.057 | -0.063 | -0.015 |
| Y | 0.0799 | 0.0828 | -0.039 | 0.0198 | 0.0685 | 0.0432 | 0.0341 | 0.0262 | 0.0211 | -0.005 | 0.129  | -0.034 | -0.058 | -0.09  | 0.0434 |
| X | 0      | 0      | 0      | 0      | 0      | 0      | 0      | 0      | 0      | 0      | 0      | 0      | 0      | 0      | 0      |
|   | -5     | -4     | -3     | -2     | -1     | 0      | 1      | 2      | 3      | 4      | 5      | 6      | 7      | 8      | 9      |
| A | 0.0533 | 0.0464 | 0.068  | 0.1346 | 0.0116 | 0      | -0.056 | 0.1081 | -0.002 | -0.008 | 0.0783 | 0.0383 | 0.0215 | 0.07   | -0.034 |
| C | -0.112 | 0.0184 | 0.005  | -0.033 | 0.0163 | 0      | -0.027 | 0.0487 | -0.078 | -0.027 | -0.059 | -0.027 | -2E-04 | -0.015 | -0.069 |
| D | -0.103 | -0.107 | -0.093 | -0.067 | -0.038 | 0      | -0.132 | -0.053 | -0.048 | -0.033 | -0.086 | -0.01  | -0.084 | 0.0328 | 0.0044 |
| E | -0.076 | -0.143 | -0.083 | -0.098 | -0.093 | 0      | -0.001 | -0.07  | -0.127 | -0.094 | -0.174 | -0.096 | -0.018 | -0.193 | -0.087 |
| F | 0.02   | -0.064 | -0.032 | -0.066 | -0.045 | 0      | 0.0352 | -0.157 | 0.09   | -0.056 | -0.157 | 0.0253 | 0.0836 | 0.0643 | -0.181 |
| G | 0.1241 | 0.1074 | 0.1307 | 0.1699 | 0.1667 | 0      | 0.136  | 0.1798 | 0.1209 | 0.1331 | 0.1955 | 0.1302 | 0.0804 | 0.1712 | 0.1339 |
| H | -0.009 | 0.0526 | -0.14  | -0.104 | -0.053 | 0      | -0.044 | -0.005 | 0.0164 | -0.073 | -0.02  | -0.026 | -0.012 | -0.131 | -0.063 |
| I | -0.044 | -0.048 | -0.079 | 0.0028 | -0.082 | 0      | -0.156 | -0.127 | -0.153 | -0.024 | -0.075 | -0.031 | -0.068 | -0.207 | 0.0112 |
| K | -0.123 | -0.049 | -0.022 | -0.033 | -0.101 | 0      | -0.099 | -0.038 | -0.011 | -0.035 | 0.012  | 0.0095 | -0.038 | 0.0298 | 0.0453 |
| L | -0.103 | -0.122 | -0.112 | -0.032 | -0.1   | 0      | -0.139 | -0.071 | 0.0652 | -0.017 | -0.041 | -0.066 | -0.021 | -0.149 | -0.15  |

|   |        |        |        |        |        |        |        |        |        |        |        |        |        |        |        |
|---|--------|--------|--------|--------|--------|--------|--------|--------|--------|--------|--------|--------|--------|--------|--------|
| M | 0.0617 | 0.0086 | 0.1509 | -0.04  | 0.0305 | 0      | -0.091 | 0.0339 | 0.0366 | -0.053 | -0.025 | 0.0217 | -4E-04 | -0.097 | 0.0089 |
| N | -0.051 | 0.0023 | -0.146 | -0.079 | -0.072 | 0      | -0.042 | 0.0296 | -0.124 | 0.0184 | 0.0576 | -0.017 | -0.01  | 0.0689 | 0.0443 |
| P | -0.048 | 0.1158 | -0.04  | -0.039 | 0.0924 | 0      | -0.111 | -0.041 | -0.113 | -0.013 | 0.0521 | -0.01  | 0.1044 | 0.005  | 0.0284 |
| Q | -0.048 | 0.0141 | 0.0246 | -0.089 | 0.0329 | 0      | -0.173 | -0.103 | -0.045 | 0.0147 | -0.109 | -0.027 | 0.0215 | -0.075 | -0.113 |
| R | 0.1702 | 0.163  | 0.1904 | 0.1321 | 0.1322 | 0      | -0.111 | 0.1139 | 0.086  | 0.1565 | 0.0189 | 0.0164 | 0.0215 | 0.0795 | 0.0339 |
| S | 0.0659 | 0.0644 | 0.0775 | 0.0823 | 0.0092 | 0      | -0.122 | -0.117 | 0.0158 | -0.004 | 0.0531 | 0.082  | -0.15  | 0.0103 | 0.0134 |
| T | 0.0085 | -0.029 | -0.015 | -0.201 | -0.032 | 0      | -0.105 | 0.0116 | -0.053 | -0.041 | -0.018 | -0.083 | -0.024 | -0.05  | 0.0214 |
| V | -0.096 | -0.167 | -0.052 | -0.008 | -0.166 | 0      | -0.068 | -0.16  | -0.008 | -0.046 | -0.083 | -0.112 | -0.132 | -0.02  | -0.018 |
| W | 0.0111 | -0.086 | -0.043 | -0.056 | -0.036 | 0      | -0.004 | -0.05  | 0.003  | -0.033 | -0.043 | -0.01  | 0.061  | -0.063 | 0.112  |
| Y | 0.0719 | -0.023 | -0.124 | -0.025 | -6E-04 | 0      | -0.087 | -0.127 | 0.0099 | -0.037 | -0.074 | -0.012 | 0.0673 | 0.009  | 0.0082 |
| X | 0      | 0      | 0      | 0      | 0      | 0      | 0      | 0      | 0      | 0      | 0      | 0      | 0      | 0      | 0      |
|   | 10     | 11     | 12     | 13     | 14     | 15     | 16     | 17     | 18     | 19     | 20     | 21     | 22     | 23     | 24     |
| A | -0.071 | 0.1115 | -0.003 | -0.048 | 0.0329 | 0.0466 | -0.057 | 0.0911 | 0.0458 | -0.035 | -0.113 | -0.099 | -0.047 | 0.0418 | -0.031 |
| C | -0.002 | -0.057 | -0.062 | -0.02  | -0.02  | 0.0036 | 0.0147 | 0.0218 | -0.022 | -0.017 | 0.0459 | -0.019 | -0.114 | -0.031 | -0.087 |
| D | -0.025 | -0.059 | -0.102 | -0.097 | -0.103 | -0.071 | 0.0553 | -0.028 | 0.0847 | -0.04  | -0.034 | 0.0276 | -0.041 | -0.009 | -0.024 |
| E | -0.042 | -0.085 | -0.056 | -0.085 | -0.07  | -0.055 | -0.135 | -0.072 | -0.065 | -0.077 | 0.0656 | -0.138 | -0.09  | 0.0066 | -0.008 |
| F | -0.022 | -0.181 | -0.035 | -0.071 | -0.037 | -0.087 | -0.037 | 0.0369 | -0.041 | 0.0852 | -0.097 | -0.003 | 0.0166 | 0.0268 | 0.0503 |
| G | 0.1316 | 0.1305 | 0.094  | 0.1973 | 0.0677 | 0.0875 | 0.1138 | 0.098  | 0.1374 | 0.1319 | 0.1401 | 0.1314 | 0.0765 | 0.1606 | 0.062  |
| H | 0.0089 | -0.081 | -0.028 | 0.0317 | 0.0018 | -0.002 | -0.007 | -0.154 | -0.042 | -0.062 | -0.022 | -0.094 | 0.0422 | 0.0228 | 0.0024 |
| I | -0.041 | -0.133 | -0.133 | -0.033 | 0.0217 | 0.0015 | -0.021 | -0.125 | -0.067 | -0.066 | 0.0127 | -0.134 | -0.108 | -0.101 | -0.078 |
| K | -0.124 | 0.0406 | -0.025 | 0.054  | -0.099 | -0.086 | 0.027  | -0.115 | -0.06  | -0.069 | -0.074 | 0.0001 | -0.072 | -0.053 | -0.139 |
| L | -0.124 | -0.037 | -0.02  | -0.105 | -0.032 | -0.058 | -0.086 | 0.0051 | -0.218 | -0.011 | -0.127 | -0.009 | 0.0055 | -0.089 | -0.03  |
| M | -0.024 | 0.1217 | 0.114  | -0.076 | -0.029 | 0.0593 | -0.054 | -0.058 | -0.011 | 0.003  | -0.146 | -0.011 | -0.018 | 0.011  | 0.0128 |
| N | -0.08  | -0.191 | -0.026 | -0.126 | -0.085 | -0.033 | -0.094 | 0.0194 | 0.0013 | -0.019 | -0.032 | -0.037 | -0.01  | -0.053 | 0.0173 |
| P | 0.0047 | 0.0537 | 0.0437 | 0.0809 | 0.0774 | 0.0616 | 0.1305 | -9E-04 | 0.0815 | 0.0053 | 0.0607 | 0.086  | 0.1484 | 0.0387 | 0.0385 |
| Q | -0.002 | 0.0036 | -0.086 | -0.046 | 0.0017 | -0.101 | -0.071 | 0.0434 | -0.092 | -0.034 | 0.066  | -0.041 | -0.021 | -0.119 | -0.051 |
| R | 0.1617 | 0.0526 | 0.0887 | 0.0478 | 0.107  | 0.0736 | 0.131  | 0.0661 | 0.0309 | 0.0742 | 0.0923 | 0.0632 | 0.0706 | 0.0003 | 0.0586 |
| S | 0.0335 | 0.0204 | 0.004  | 0.0227 | -0.071 | 0.0453 | 0.0104 | -0.047 | 0.0102 | -0.016 | 0.0251 | 0.0641 | 0.0425 | 0.0187 | 0.0241 |
| T | 0.0386 | 0.0135 | 0.0053 | -0.004 | 0.0769 | -0.003 | -0.169 | -0.129 | 0.0332 | -0.029 | -0.059 | -0.082 | -0.014 | -0.029 | -0.031 |
| V | -0.035 | -0.115 | -0.042 | -0.094 | 0.0454 | 0.0254 | -0.09  | -0.007 | -0.143 | -0.029 | -0.08  | -0.071 | -0.156 | -0.034 | 0.0297 |
| W | -0.086 | 0.0116 | -0.029 | -0.029 | -0.081 | -0.029 | 0.0055 | -0.001 | -0.014 | 0.0041 | -0.044 | -9E-04 | -0.057 | 0.0098 | -0.051 |
| Y | 0.0371 | -3E-04 | 0.0864 | -0.012 | -0.007 | -0.045 | -0.003 | 0.101  | 0.0933 | -0.024 | 0.0455 | 0.0537 | 0.0936 | -0.04  | 0.056  |
| X | 0      | 0      | 0      | 0      | 0      | 0      | 0      | 0      | 0      | 0      | 0      | 0      | 0      | 0      | 0      |
|   | 25     | 26     | 27     | 28     | 29     | 30     | 31     | 32     | 33     | 34     | 35     | 36     | 37     | 38     | 39     |
| A | 0.0352 | -0.078 | -0.01  | 0.0785 | -0.005 | 0.0872 | 0.0384 | -0.001 | -0.057 | -0.071 | 0.0171 | -0.034 | -0.108 | -0.02  | -0.002 |
| C | 0.0554 | 0.0796 | -0.119 | 0.0805 | -0.057 | -0.082 | -0.031 | -0.007 | -0.019 | 0.0159 | 0.0475 | -0.006 | 0.0567 | -0.1   | 0.0045 |
| D | 0.0038 | 0.0169 | -0.179 | 0.0317 | 0.0325 | 0.0073 | 0.0383 | -0.04  | -0.029 | -0.071 | -0.034 | 0.0241 | -0.094 | 0.0458 | 0.0776 |
| E | -0.165 | -0.05  | -0.043 | -0.05  | -0.102 | -0.108 | -0.041 | 0.0552 | 0.0014 | 0.0567 | -0.076 | -0.032 | 0.0044 | -0.025 | -0.089 |
| F | -0.018 | -0.014 | 0.0345 | 0.0201 | 0.0154 | 0.0095 | 0.0081 | -0.135 | -0.021 | 0.0062 | 0.0561 | -0.032 | 0.0527 | -0.017 | -0.032 |
| G | 0.0983 | 0.0876 | 0.1609 | 0.1102 | 0.0018 | 0.1436 | 0.0832 | 0.0861 | 0.1179 | 0.1812 | 0.0919 | 0.1503 | 0.118  | 0.1524 | 0.1222 |

|   |        |        |        |        |        |        |        |        |        |        |        |        |        |        |        |
|---|--------|--------|--------|--------|--------|--------|--------|--------|--------|--------|--------|--------|--------|--------|--------|
| H | -0.025 | -0.002 | 0.0158 | 0.0339 | -0.022 | 0.0024 | -0.002 | -0.076 | 0.0116 | -0.049 | 0.022  | -0.077 | -0.016 | 0.0342 | -0.053 |
| I | 0.0023 | 0.0583 | -0.001 | -0.058 | -0.123 | -0.063 | -0.033 | -0.088 | -0.067 | -0.047 | -0.031 | -0.011 | -0.067 | -0.05  | -0.06  |
| K | -0.035 | -0.098 | -0.052 | 0.0208 | -0.037 | -0.012 | 0.0488 | 0.02   | 0.0014 | -0.021 | -0.04  | -0.177 | -0.059 | -0.278 | 0.0005 |
| L | -0.143 | -0.003 | -0.137 | -0.048 | -0.046 | -0.041 | 0.0168 | -0.043 | -0.084 | 0.0451 | -0.027 | -0.074 | -0.122 | -0.038 | -0.043 |
| M | -0.049 | 0.0334 | -0.001 | -0.076 | -0.01  | -0.052 | 0.0078 | 0.0032 | 0.0489 | -0.086 | 0.0347 | 0.0063 | 0.0344 | 0.0666 | 0.0617 |
| N | -0.127 | -0.114 | 0.1213 | -0.016 | 0.0157 | -0.006 | 0.042  | 0.1053 | -0.029 | 0.137  | 0.0436 | 0.0749 | -0.071 | -0.051 | -0.041 |
| P | -0.03  | 0.0799 | -0.053 | -0.011 | 0.0087 | -0.038 | -0.038 | -0.139 | -0.031 | -0.029 | 0.0767 | 0.0283 | 0.1116 | 0.001  | 0.0193 |
| Q | -0.044 | -0.135 | -0.05  | -0.089 | 0.0175 | 0.0073 | 0.0275 | -0.015 | 0.043  | -0.164 | -0.016 | -0.011 | -0.021 | 0.0198 | -0.075 |
| R | 0.0868 | 0.1023 | 0.0102 | -0.04  | 0.1475 | 0.1034 | 0.0267 | -0.001 | 0.0526 | 0.024  | -0.04  | 0.0432 | 0.031  | -0.011 | 0.0008 |
| S | 0.1289 | -0.006 | -0.02  | 0.0149 | 0.0251 | -0.1   | -0.184 | -0.05  | -0.026 | -0.04  | -0.009 | 0.0289 | 0.0342 | 0.003  | -0.014 |
| T | -0.085 | -0.062 | 0.0113 | -0.098 | 0.0498 | 0.0047 | -0.082 | 0.0878 | -0.04  | -0.037 | -0.094 | 0.0436 | -0.071 | 0.0145 | -0.024 |
| V | -0.034 | -0.095 | -0.032 | -0.009 | 0.0036 | -0.013 | -0.024 | 0.033  | 0.0328 | -0.077 | -0.104 | -0.152 | -0.124 | 0.0284 | 0.0123 |
| W | 0.0059 | -0.025 | 0.0537 | -0.051 | -0.044 | -0.044 | -0.013 | 0.0625 | -0.064 | -0.071 | -0.071 | -0.037 | 0.1338 | -6E-04 | -0.059 |
| Y | 0.0528 | 0.0105 | 0.0389 | -0.01  | -0.062 | -0.071 | 0.047  | -0.017 | 0.0353 | -0.048 | 0.0647 | 0.0104 | 0.0876 | -0.024 | 0.0157 |
| X | 0      | 0      | 0      | 0      | 0      | 0      | 0      | 0      | 0      | 0      | 0      | 0      | 0      | 0      | 0      |
|   | 40     | 41     | 42     | 43     | 44     | 45     | 46     | 47     | 48     | 49     | 50     |        |        |        |        |
| A | 0.0106 | 0.0233 | -0.019 | 0.084  | 0.1432 | -0.068 | 0.1096 | 0.0323 | -0.071 | -0.041 | -0.066 |        |        |        |        |
| C | -0.036 | -0.042 | 0.0215 | 0.0098 | -0.1   | -0.043 | -0.043 | -0.058 | -0.031 | -0.101 | -0.024 |        |        |        |        |
| D | -0.013 | 0.0012 | -0.044 | -0.009 | -0.106 | -0.068 | 0.0243 | 0.1201 | -0.039 | -0.032 | -0.022 |        |        |        |        |
| E | -0.062 | -0.113 | -0.059 | 0.0104 | -0.038 | -0.079 | -0.028 | -0.14  | 0.003  | -0.12  | 0.0697 |        |        |        |        |
| F | -0.018 | -0.041 | -0.082 | -0.049 | -0.063 | -0.113 | 0.0422 | 0.1692 | 0.08   | -0.044 | -0.01  |        |        |        |        |
| G | 0.0862 | 0.1371 | 0.0749 | 0.0625 | 0.0891 | 0.1088 | 0.0524 | 0.082  | 0.092  | 0.1086 | 0.0849 |        |        |        |        |
| H | -0.096 | -0.049 | -0.026 | -0.012 | 0.0435 | 0.0909 | -0.073 | 0.0767 | -0.011 | -0.01  | 0.0264 |        |        |        |        |
| I | 0.0308 | -0.084 | -0.064 | 0.0306 | -0.109 | -0.068 | -0.066 | 0.0642 | -0.032 | -0.126 | 0.1013 |        |        |        |        |
| K | -0.06  | -0.165 | -0.009 | -0.057 | 0.0002 | -0.006 | -0.073 | -0.032 | -0.007 | 0.1088 | -0.041 |        |        |        |        |
| L | -0.006 | 0.0158 | -0.062 | -0.053 | -0.041 | -0.047 | 0.0436 | -0.095 | 0.0243 | 0.0155 | -0.039 |        |        |        |        |
| M | -0.041 | 0.0521 | 0.0387 | -0.171 | -0.096 | 0.0433 | 0.0608 | -0.001 | 0      | 0.0153 | 0.0016 |        |        |        |        |
| N | -0.06  | 0.0714 | 0.1664 | 0.0256 | 0.0675 | 0.0523 | 0.0646 | -0.137 | -0.028 | -0.077 | -0.046 |        |        |        |        |
| P | 0.0083 | -0.041 | -0.019 | -0.02  | 0.0071 | 0.1576 | -0.061 | -0.057 | -0.033 | 0.0143 | -0.015 |        |        |        |        |
| Q | 0.0315 | 0.0017 | 0.0231 | -0.013 | -0.075 | -0.076 | 0.0047 | -0.009 | 0.0414 | 0.0046 | -0.053 |        |        |        |        |
| R | 0.0779 | 0.0008 | -0.003 | 0.0354 | 0.0071 | 0.0034 | -0.024 | -0.015 | 0.1119 | 0.0769 | -0.125 |        |        |        |        |
| S | 0.0954 | 0.0114 | -0.014 | -0.019 | 0.0457 | 0.0022 | -0.059 | -0.011 | -0.089 | -0.022 | -0.063 |        |        |        |        |
| T | -0.002 | -0.019 | -0.029 | 0.001  | 0.0046 | -0.107 | -0.083 | 0.0317 | -0.043 | 0.0177 | 0.0584 |        |        |        |        |
| V | -0.109 | -0.053 | -0.038 | -0.093 | -0.082 | -0.068 | -0.003 | -0.065 | -0.052 | -0.031 | -0.09  |        |        |        |        |
| W | -0.052 | 0.006  | -0.052 | 0.0964 | 0.0471 | -0.095 | -0.001 | -0.059 | -0.045 | 0.092  | -0.006 |        |        |        |        |
| Y | -0.02  | 0.0869 | 0.0682 | 0.0616 | 0.0341 | 0.0788 | 0.0058 | -0.064 | 0.0197 | -0.078 | 0.1623 |        |        |        |        |
| X | 0      | 0      | 0      | 0      | 0      | 0      | 0      | 0      | 0      | 0      | 0      |        |        |        |        |

### Lysine methylation.

|   |        |        |        |        |        |        |        |        |       |        |        |        |        |       |        |
|---|--------|--------|--------|--------|--------|--------|--------|--------|-------|--------|--------|--------|--------|-------|--------|
|   | -35    | -34    | -33    | -32    | -31    | -30    | -29    | -28    | -27   | -26    | -25    | -24    | -23    | -22   | -21    |
| A | -0.056 | 0.0901 | 0.0416 | -0.042 | 0.1104 | -0.002 | 0.0385 | -0.031 | 0.041 | 0.1175 | 0.1305 | 0.0171 | 0.0327 | 0.059 | 0.0726 |

|   |        |        |        |        |        |        |        |        |        |        |        |        |        |        |        |
|---|--------|--------|--------|--------|--------|--------|--------|--------|--------|--------|--------|--------|--------|--------|--------|
| C | -0.076 | -0.049 | -0.058 | -0.096 | -0.044 | -0.09  | 0.0482 | 0.0225 | -0.015 | 0.0435 | -0.075 | -0.03  | 0.0534 | -0.014 | -0.121 |
| D | -0.024 | -0.111 | -0.006 | 0.0097 | 0.0765 | 0.0219 | -0.051 | 0.0017 | 0.0541 | 0.0423 | 0.0058 | -0.02  | -0.029 | -0.01  | -0.146 |
| E | -0.037 | -0.005 | 0.0011 | 0.0397 | 0.1176 | -0.053 | -0.01  | 0.0297 | 0.0313 | -0.084 | 0.0268 | -0.041 | -0.064 | 0.0237 | 0.0277 |
| F | -0.083 | -0.198 | -0.167 | -0.006 | -0.109 | -0.166 | 0.0548 | -0.102 | 0.0622 | 0.0546 | 0.0196 | 0.0479 | -0.108 | -0.041 | 0.0981 |
| G | 0.0515 | 0.0759 | -0.007 | 0.0047 | 0.0774 | -0.009 | 0.0265 | -0.065 | 0.063  | -0.067 | 0.0338 | 0.1144 | -0.072 | 0.0096 | 0.0556 |
| H | -0.014 | 0.0656 | 0.1095 | 0.0303 | -0.062 | 0.0393 | 0.118  | 0.0435 | -0.104 | -0.019 | -0.028 | -0.074 | 0.0209 | 0.08   | -0.001 |
| I | -0.15  | -0.025 | 0.0187 | -0.087 | -0.066 | -0.022 | 0.1064 | 0.0083 | -0.06  | 0.143  | 0.0869 | 0.0411 | 0.1631 | -9E-04 | -0.088 |
| K | 0.0832 | 0.0006 | 0.0663 | 0.0052 | 0.0585 | 0.0124 | -0.095 | 0.0213 | -0.049 | -0.018 | -0.122 | -0.155 | 0.0112 | -0.007 | -0.013 |
| L | -0.082 | -0.045 | -0.008 | -0.046 | 0.0002 | 0.0866 | -0.049 | -0.077 | -0.095 | -0.01  | -0.133 | -0.071 | -7E-04 | 0.0486 | -0.017 |
| M | 0.097  | 0.0499 | 0.0081 | 0.0281 | 0.0207 | 0.0319 | -0.024 | 0.0029 | -0.066 | 0.0164 | 0.003  | -0.049 | 0.0568 | -0.023 | -0.053 |
| N | -0.005 | 0.0607 | 0.0193 | 0.0747 | -0.016 | -0.037 | -0.07  | -0.061 | 0.0376 | 0.0181 | 0.0751 | -0.041 | -0.097 | 0.0754 | 0.0519 |
| P | 0.0118 | -0.076 | 0.0124 | -0.046 | -0.098 | -0.031 | -0.069 | -0.077 | 0.0263 | -0.014 | -0.04  | 0.0872 | -0.085 | -0.032 | 0.027  |
| Q | -0.033 | -0.009 | -0.091 | -7E-04 | -0.21  | 0.0125 | 0.0275 | -0.01  | -0.055 | -0.106 | -0.037 | 0.0579 | -0.1   | -0.223 | -0.051 |
| R | -0.005 | 0.0741 | -0.017 | -0.005 | -0.092 | 0.0041 | -0.187 | 0.1591 | 0.0279 | 0.009  | -0.029 | -0.015 | -9E-04 | 0.0397 | 0.0097 |
| S | 0.097  | -0.016 | 0.0146 | 0.1111 | -0.042 | 0.0438 | -0.013 | -0.016 | 0.0292 | -0.105 | 0.051  | -0.07  | -0.012 | 0.0202 | 0.0638 |
| T | 0.0118 | 0.0104 | -0.06  | 0.0646 | -0.065 | 0.0643 | 0.096  | -0.006 | -0.08  | -0.115 | -0.023 | 0.0755 | 0.0658 | -0.074 | 0.0005 |
| V | 0.097  | -0.019 | 0.0634 | -0.159 | -0.043 | -0.016 | 0.0144 | 0.0681 | -0.049 | -0.063 | 0.051  | -0.088 | -0.032 | -0.017 | -0.129 |
| W | -0.034 | -0.065 | -0.053 | 0.008  | 0.0077 | -0.069 | 0.02   | 0.0018 | 0.0267 | -0.046 | -0.052 | 0.0561 | 0.0801 | 0.0078 | 0.0802 |
| Y | -0.034 | -0.058 | -0.127 | -0.058 | -0.032 | -0.04  | 0.0078 | -0.045 | 0.061  | 0.0823 | -0.08  | 0.1526 | 0.0568 | -0.074 | -0.039 |
| X | 0      | 0      | 0      | 0      | 0      | 0      | 0      | 0      | 0      | 0      | 0      | 0      | 0      | 0      | 0      |
|   | -20    | -19    | -18    | -17    | -16    | -15    | -14    | -13    | -12    | -11    | -10    | -9     | -8     | -7     | -6     |
| A | -0.034 | -0.004 | -2E-04 | -0.026 | 0.0903 | -0.004 | -0.003 | -0.037 | -0.061 | 0.0381 | 0.0561 | 0.0532 | 0.0925 | -0.032 | -0.013 |
| C | -0.019 | 0.044  | -0.015 | 0.0218 | -0.035 | 0.0977 | 0.0616 | -0.041 | 0.0304 | 0.0166 | -0.074 | -0.074 | 0.0018 | 0.1132 | -0.047 |
| D | -0.019 | -0.071 | 0.0118 | -0.052 | -0.004 | -0.075 | -0.028 | -0.127 | 0.0039 | 0.0239 | -0.068 | -0.065 | -0.13  | 0.0855 | 0.0172 |
| E | -0.132 | -0.047 | -0.045 | 0.0057 | -0.078 | -0.09  | -0.011 | -0.016 | -0.046 | 0.0354 | -0.052 | -0.061 | -0.129 | 0.0236 | 0.0533 |
| F | -0.108 | 0.0678 | 0.0892 | -0.101 | 0.0342 | -0.064 | 0.0597 | -0.111 | 0.0008 | -0.156 | -0.02  | -0.036 | 0.0009 | -0.111 | -0.115 |
| G | 0.0031 | -0.03  | 0.0146 | 0.0484 | 0.0264 | -0.061 | -0.046 | 0.0013 | 0.0209 | -0.042 | 0.1039 | 0.0831 | -0.033 | -0.013 | 0.0238 |
| H | 0.0346 | 0.003  | -0.036 | 0.0286 | 0.0241 | -0.054 | -0.078 | 0.0714 | 0.0218 | -0.072 | 0.0116 | -0.036 | -0.015 | -0.094 | -0.06  |
| I | 0.0264 | -0.073 | -0.057 | 0.0263 | 0.0649 | 0.0218 | -0.025 | 0.0303 | 0.0777 | -0.095 | -0.106 | -0.07  | 0.0048 | -0.073 | 0.0459 |
| K | 0.0878 | 0.1404 | -0.031 | 0.0961 | 0.0006 | 0.0322 | -0.119 | 0.0954 | 0.1265 | 0.1398 | -0.001 | 0.0838 | 0.1374 | 0.1161 | 0.1614 |
| L | 0.0176 | 0.1025 | -0.004 | -0.009 | -0.006 | -0.041 | -0.14  | 0.0174 | -0.079 | -0.099 | -0.104 | -0.011 | -0.011 | -0.162 | -0.066 |
| M | 0.0767 | -0.057 | 0.0563 | 0.0642 | 0.0286 | -0.058 | -0.003 | 0.1031 | 0.0089 | 0.0559 | 0.0296 | 0.036  | 0.0144 | -0.016 | 0.003  |
| N | 0.0157 | -0.057 | 0.0375 | -0.024 | -0.048 | -0.039 | 0.0028 | -0.006 | -0.026 | 0.0133 | -0.042 | 0.0317 | 0.0009 | -0.01  | 0.086  |
| P | 0.0597 | -0.065 | 0.0144 | -0.05  | -0.077 | 0.0357 | 0.0299 | 0.0133 | -0.114 | 0.0325 | 0.0317 | -0.119 | -0.1   | -0.087 | -0.032 |
| Q | -0.063 | -0.045 | 0.0276 | 0.0008 | 0.095  | -0.062 | 0.0271 | -0.055 | -0.105 | -0.077 | 0.1419 | -0.043 | 0.0027 | -0.021 | -0.141 |
| R | -0.164 | -0.008 | -0.054 | -0.04  | 0.0176 | -0.046 | 0.0145 | -0.033 | 0.1346 | 0.0301 | -0.055 | 0.0132 | 0.0267 | 0.011  | -0.014 |
| S | 0.0728 | 0.0844 | 0.0267 | 0.0602 | -0.043 | 0.0672 | 0.0358 | -0.072 | -0.042 | -0.053 | 0.0368 | 0.0362 | 0.0512 | 0.0085 | -0.063 |
| T | 0.0332 | -0.06  | 0.0372 | -0.139 | -0.006 | 0.0542 | 0.064  | 0.0397 | -0.022 | -0.056 | 0.0015 | -0.029 | -0.084 | 0.0846 | -0.021 |
| V | 0.0127 | -0.108 | -0.082 | -0.058 | -0.125 | 0.0861 | 0.0901 | -0.009 | -0.108 | 0.0679 | 0.0288 | 0.0638 | 0.0918 | -0.029 | 0.0486 |
| W | -0.084 | -0.069 | -0.034 | 0.0405 | -0.025 | -0.069 | 0.0608 | 0.1886 | -0.069 | -0.046 | -0.069 | 0.0107 | -0.007 | -0.01  | -0.039 |

|   |        |        |        |        |        |        |        |        |        |        |        |        |        |        |        |
|---|--------|--------|--------|--------|--------|--------|--------|--------|--------|--------|--------|--------|--------|--------|--------|
| Y | 0.0442 | 0.025  | 0.0433 | -0.005 | 0.0184 | 0.1639 | 0.0293 | -0.067 | 0.0841 | -0.004 | -0.084 | -0.002 | 0.0144 | 0.0709 | -0.015 |
| X | 0      | 0      | 0      | 0      | 0      | 0      | 0      | 0      | 0      | 0      | 0      | 0      | 0      | 0      | 0      |
|   | -5     | -4     | -3     | -2     | -1     | 0      | 1      | 2      | 3      | 4      | 5      | 6      | 7      | 8      | 9      |
| A | -0.033 | -0.059 | -0.053 | 0.0239 | -0.07  | 0      | -0.017 | -0.01  | -0.028 | 0.1205 | 0.0328 | -0.073 | 0.0171 | -0.036 | 0.0267 |
| C | -0.037 | -0.098 | 0.047  | -0.058 | -0.025 | 0      | -0.002 | -0.084 | -0.035 | -0.084 | -0.025 | -0.029 | -0.044 | -0.024 | -0.084 |
| D | 0.0234 | 0.059  | -0.055 | -0.054 | 0.0185 | 0      | 0.0087 | 0.0489 | -0.017 | 0.0786 | 0.0616 | -0.054 | 0.0798 | -0.104 | 0.0536 |
| E | -0.009 | -0.069 | -0.035 | -0.027 | -0.11  | 0      | -0.012 | -0.16  | -0.025 | -0.016 | -0.059 | -0.087 | 0.0108 | 0.0379 | 0.0122 |
| F | -0.058 | -0.061 | -0.078 | 0.0122 | 0.1085 | 0      | -0.035 | 0.0367 | 0.0065 | -0.095 | 0.0309 | 0.1329 | -0.091 | -0.022 | -0.113 |
| G | -0.091 | 0.0899 | 0.0172 | 0.0573 | 0.0194 | 0      | -0.017 | 0.0505 | 0.1033 | -0.053 | 0.1086 | -0.023 | -0.042 | 0.0872 | 0.0003 |
| H | -0.052 | 0.0204 | -0.019 | -0.071 | -0.107 | 0      | -0.107 | 0.0248 | 0.0414 | 0.0614 | -0.015 | -0.083 | -0.014 | -0.053 | -0.018 |
| I | 0.0978 | 0.0608 | 0.0291 | -0.036 | -0.088 | 0      | 0.018  | 0.0304 | 0.1069 | 0.0079 | -0.084 | 0.0536 | -0.118 | 0.0373 | 0.0434 |
| K | 0.1121 | 0.0013 | 0.0809 | 0.1275 | 0.1828 | 0      | -0.103 | -0.114 | -0.032 | 0.0221 | 0.0032 | 0.0112 | 0.0641 | 0.1362 | -0.053 |
| L | -0.083 | -0.045 | 0.0063 | -0.156 | -0.015 | 0      | -0.034 | 0.03   | -0.049 | -0.095 | -0.102 | -0.095 | -0.09  | -0.141 | -0.006 |
| M | -0.12  | 0.0431 | 0.0603 | 0.0412 | -0.03  | 0      | -0.033 | -0.024 | 0.0469 | -0.01  | -0.023 | -0.049 | -0.098 | 0.0895 | 0.0235 |
| N | 0.0391 | 0.056  | 0.0365 | 0.0665 | -0.133 | 0      | -0.015 | -0.075 | 0.0057 | -0.026 | -0.015 | 0.0386 | 0.1174 | -0.01  | -0.063 |
| P | 0.0144 | 0.0728 | 0.0237 | 0.0665 | 0.0549 | 0      | 0.0816 | 0.0426 | -0.039 | 0.0893 | -0.037 | 0.0065 | 0.1078 | -0.012 | 0.0105 |
| Q | -0.051 | 0.0208 | 0.0176 | -0.018 | -0.13  | 0      | -0.041 | -0.162 | -0.159 | -0.108 | -0.035 | -0.104 | -0.001 | -0.095 | -0.126 |
| R | -0.014 | -0.019 | 0.0115 | -0.073 | 0.1836 | 0      | 0.085  | -0.024 | -0.036 | 0.0302 | 0.008  | -0.034 | 0.0627 | -0.003 | 0.0283 |
| S | -0.047 | -0.021 | -0.006 | 0.063  | 0.0266 | 0      | 0.1338 | 0.0347 | 0.0566 | -0.077 | 0.0312 | -0.008 | -0.01  | 0.0292 | -0.008 |
| T | 0.0321 | -0.064 | 0.0206 | -0.004 | -0.033 | 0      | -0.039 | 0.0713 | -0.026 | -0.129 | -0.022 | 0.1288 | -0.11  | 0.0105 | 0.0033 |
| V | 0.0098 | 0.0134 | -0.046 | 0.0092 | -0.032 | 0      | 0.0464 | 0.0529 | -0.056 | -0.003 | 0.0106 | 0.1267 | -0.056 | -0.046 | 0.1021 |
| W | 0.0898 | -0.002 | -0.074 | -0.079 | -0.01  | 0      | 0.0459 | 0.0852 | 0.035  | 0.0355 | 0.015  | -0.084 | -0.003 | -0.014 | -0.008 |
| Y | 0.1093 | -0.061 | 0.0101 | 0.0268 | -0.028 | 0      | -0.117 | 0.0367 | 0.0476 | 0.0988 | 0.0394 | 0.0548 | 0.0359 | 0.0022 | 0.0359 |
| X | 0      | 0      | 0      | 0      | 0      | 0      | 0      | 0      | 0      | 0      | 0      | 0      | 0      | 0      | 0      |
|   | 10     | 11     | 12     | 13     | 14     | 15     | 16     | 17     | 18     | 19     | 20     | 21     | 22     | 23     | 24     |
| A | 0.0775 | 0.1368 | -0.009 | 0.0019 | -0.046 | -0.071 | -0.114 | -0.028 | -0.16  | -0.056 | 0.0139 | -0.015 | 0.0178 | -0.065 | 0.0933 |
| C | -0.074 | 0.0147 | -1E-04 | 0.048  | -0.085 | -0.069 | -0.009 | 0.0103 | -0.039 | 0.0357 | -0.019 | -0.064 | 0.0323 | -0.11  | 0.034  |
| D | -0.038 | 0.1302 | -0.09  | -0.141 | 0.0574 | 0.051  | -0.119 | -0.024 | 0.09   | -0.025 | -0.04  | 0.1197 | -0.071 | 0.0485 | 0.0254 |
| E | -0.051 | -0.12  | 0.0098 | -0.132 | 0.0362 | 0.0016 | -0.063 | -0.091 | 0.0295 | -0.167 | 0.0139 | -0.025 | -0.06  | -0.022 | -0.059 |
| F | 0.0446 | 0.0264 | 0.0074 | 0.0272 | -0.106 | -0.026 | -0.026 | -0.01  | 0.0507 | -0.008 | -0.035 | 0.0338 | -0.006 | 0.0387 | -0.12  |
| G | 0.0193 | -0.074 | 0.0746 | -0.063 | -0.031 | 0.0226 | -0.013 | -0.043 | -0.111 | 0.0668 | 0.0228 | 0.0296 | 0.0129 | 0.0615 | -0.106 |
| H | 0.0358 | -0.157 | -0.075 | 0.0096 | -0.106 | -0.134 | 0.0196 | 0.0294 | 0.031  | 0.0491 | -0.054 | -0.109 | 0.0512 | -0.008 | 0.1035 |
| I | 0.0528 | -0.042 | -0.183 | -0.051 | 0.0977 | 0.0114 | 0.0097 | 0.0264 | 0.0198 | 0.0632 | 0.0519 | 0.0185 | -0.061 | 0.0851 | -0.112 |
| K | -0.058 | 0.0903 | 0.1246 | 0.0456 | 0.1155 | 0.1197 | 0.1244 | 0.0897 | 0.119  | 0.0684 | 0.0084 | 0.0696 | 0.0176 | 0.0073 | 0.0416 |
| L | -0.029 | 0.0214 | -0.103 | 0.0589 | -0.118 | 0.0154 | 0.008  | -0.055 | 0.0303 | -0.191 | -0.01  | -0.051 | -0.021 | -0.064 | 0.0103 |
| M | -0.006 | -0.049 | 0.0443 | 0.0356 | -0.051 | -0.059 | -0.009 | 0.0596 | 0.0166 | -0.012 | -0.057 | -0.075 | 0.0467 | -3E-05 | -0.048 |
| N | -0.012 | 0.0191 | 0.0292 | 0.0263 | -0.081 | 0.076  | -0.154 | -0.04  | -0.035 | -0.001 | -0.076 | 0.0179 | 0.0726 | 0.0373 | 0.0434 |
| P | 0.1075 | 0.0448 | -0.002 | 0.005  | 0.0231 | -0.036 | 0.1139 | 0.0093 | 0.0399 | 0.0033 | -0.051 | 0.0506 | 0.0368 | -0.093 | -0.124 |
| Q | -0.064 | -0.134 | -0.015 | 0.0069 | -0.05  | -0.021 | -0.048 | -8E-04 | -0.091 | -0.075 | -0.015 | -0.114 | -0.03  | -0.087 | 0.0561 |
| R | -0.154 | -0.096 | 0.0245 | 0.1345 | -0.063 | -0.032 | 0.0734 | 0.0025 | 0.0343 | 0.0954 | 0.112  | -0.029 | -0.056 | -0.12  | 0.0604 |

|   |        |        |        |        |        |        |        |        |        |        |        |        |        |        |        |
|---|--------|--------|--------|--------|--------|--------|--------|--------|--------|--------|--------|--------|--------|--------|--------|
| S | 0.0429 | -0.006 | -0.086 | -0.142 | -0.097 | -0.08  | -0.001 | -0.01  | 0.018  | 0.0588 | -0.017 | 0.0249 | 0.0248 | -0.003 | 0.0139 |
| T | -0.009 | -0.024 | 0.0557 | 0.0283 | 0.073  | 0.0067 | 0.0134 | 0.1216 | -0.075 | -0.048 | 0.0376 | -0.06  | -0.019 | 0.0526 | 0.0594 |
| V | -0.018 | -0.04  | 0.0245 | -0.008 | 0.0635 | 0.0019 | 0.0029 | -0.023 | -0.148 | -0.079 | -0.057 | -0.038 | 0.0687 | 0.1124 | -0.115 |
| W | -0.008 | 0.0089 | -0.052 | -0.04  | 0.0155 | -0.019 | 0.0154 | 0.0554 | -0.04  | 0.1792 | 0.0163 | 0.0631 | 0.0098 | -0.047 | -0.064 |
| Y | 0.0275 | 0.0105 | -0.015 | 0.1136 | 0.1053 | 0.0363 | 0.0116 | -0.091 | -0.012 | -0.012 | 0.0698 | -0.043 | -0.087 | 0.0179 | 0.0058 |
| X | 0      | 0      | 0      | 0      | 0      | 0      | 0      | 0      | 0      | 0      | 0      | 0      | 0      | 0      | 0      |
|   | 25     | 26     | 27     | 28     | 29     | 30     | 31     | 32     | 33     | 34     | 35     |        |        |        |        |
| A | -0.046 | -0.014 | 0.0582 | -0.132 | 0.0003 | 0.0615 | 0.0044 | 0.0809 | 0.0223 | 0.0694 | 0.0397 |        |        |        |        |
| C | -0.028 | -0.078 | -0.028 | -0.081 | -0.106 | -0.007 | 0.0085 | -0.028 | 0.1018 | -0.041 | -0.011 |        |        |        |        |
| D | 0.0828 | 0.0096 | 0.0089 | -0.023 | 0.0962 | 0.096  | -0.068 | -0.198 | -0.093 | -0.143 | 0.0643 |        |        |        |        |
| E | -0.078 | -0.054 | -0.02  | -0.089 | 0.0701 | 0.071  | -0.005 | 0.0357 | -0.02  | -0.058 | -0.053 |        |        |        |        |
| F | 0.0759 | 0.0313 | -0.055 | 0.0728 | -0.038 | 0.0089 | 0.0601 | 0.043  | -0.138 | 0.0061 | 0.1038 |        |        |        |        |
| G | 0.0803 | -0.087 | 0.0241 | 0.019  | -0.044 | 0.0274 | 0.0306 | 0.0119 | 0.0357 | 0.0317 | -0.032 |        |        |        |        |
| H | 0.0421 | -0.012 | 0.0835 | 0.0683 | -0.106 | 0.0064 | 0.0154 | 0.0046 | 0.0875 | 0.0555 | -0.041 |        |        |        |        |
| I | 0.0051 | -0.084 | 0.036  | 0.0943 | -0.119 | -0.151 | -0.05  | 0.0218 | -0.002 | -0.061 | -0.042 |        |        |        |        |
| K | 0.0195 | -0.023 | 0.1249 | 0.1031 | -0.075 | 0.0341 | -0.043 | 0.0357 | 0.038  | 0.092  | 0.0198 |        |        |        |        |
| L | 0.016  | 0.0846 | -0.049 | -0.047 | -7E-04 | -0.001 | 0.0212 | -0.028 | -0.23  | 0.0145 | -0.02  |        |        |        |        |
| M | -0.029 | -0.061 | -0.045 | 0.0102 | 0.0541 | 0.0383 | 0.0339 | 0.0125 | -0.022 | -0.069 | -0.008 |        |        |        |        |
| N | -0.102 | -0.018 | 0.0289 | -0.021 | 0.0245 | -0.034 | 0.0045 | -0.085 | 0.0241 | 0.0176 | 0.0093 |        |        |        |        |
| P | 0.0313 | -0.004 | -0.05  | 0.0194 | -0.047 | 0.0542 | -0.074 | 0.0638 | -0.068 | -0.089 | -0.004 |        |        |        |        |
| Q | -0.096 | 0.0564 | -0.172 | -0.049 | -0.084 | -0.074 | -0.091 | -0.086 | 0.0084 | 0.032  | -0.08  |        |        |        |        |
| R | 0.0159 | 0.021  | -0.076 | 0.029  | -0.135 | -0.134 | 0.0001 | 0.023  | 0.0349 | 0.091  | -0.016 |        |        |        |        |
| S | 0.0234 | -0.008 | 0.056  | 0.0037 | 0.1129 | -0.15  | 0.036  | 0.0644 | -0.038 | -0.089 | 0.0107 |        |        |        |        |
| T | -0.035 | 0.0048 | -0.038 | 0.0383 | 0.0861 | 0.071  | 0.0654 | -0.02  | 0.0208 | -0.038 | -0.135 |        |        |        |        |
| V | -0.041 | 0.1339 | -0.054 | -0.03  | 0.0933 | -0.057 | 0.0118 | -0.038 | 0.0834 | 0.057  | 0.0926 |        |        |        |        |
| W | -0.059 | -0.04  | -0.001 | 0.0109 | -0.001 | -0.053 | -0.028 | -0.012 | -0.005 | -0.077 | 0.0131 |        |        |        |        |
| Y | 0.0392 | -0.016 | 0.0242 | -0.053 | 0.024  | -0.029 | 0.011  | -0.142 | 0.0956 | 0.0015 | 0.0236 |        |        |        |        |
| X | 0      | 0      | 0      | 0      | 0      | 0      | 0      | 0      | 0      | 0      | 0      |        |        |        |        |
